# Supplementary material for: Impact of the Legume Catch Crop Serradella on Subsequent Growth and P Mobilization under Barley in Different Fertilization Treatments
Source: MDPI journal article supplement (doi:10.3390/agronomy11122437), 2021-11-29
Supplement: s1 [file s1]

**Table S2.** Soil nutrient stocks ( $C_{\text{tot}}$ : total carbon,  $N_{\text{tot}}$ : total nitrogen,  $P_{\text{tot}}$ : total phosphorus) affected by fertilization (P0 – no additional P, TSP - triple superphosphate; COM - compost; COM+TSP - compost + TSP) and treatment with/without Serradella in May and July 2019 on the test site Rostock. Mean values  $\pm$  standard deviation; post hoc test Kruskal Wallis  $p < 0.05$ ; abc = differences between fertilization and treatment within the sampling date.

| Sampling Date | Fertilization | Treatment   | $C_{\text{tot}}$ (g kg <sup>-1</sup> ) | $N_{\text{tot}}$ (g kg <sup>-1</sup> ) | $P_{\text{tot}}$ (g kg <sup>-1</sup> ) |
|---------------|---------------|-------------|----------------------------------------|----------------------------------------|----------------------------------------|
| May 2019      | P0            | Serradella  | 7.9 $\pm$ 0.6b                         | 0.8 $\pm$ 0.0c                         | 0.5 $\pm$ 0.0ab                        |
|               |               | Bare fallow | 8.1 $\pm$ 0.1b                         | 0.8 $\pm$ 0.0c                         | 0.5 $\pm$ 0.0b                         |
|               | TSP           | Serradella  | 8.2 $\pm$ 0.5ab                        | 0.8 $\pm$ 0.0c                         | 0.5 $\pm$ 0.0ab                        |
|               |               | Bare fallow | 8.0 $\pm$ 0.7b                         | 0.9 $\pm$ 0.0bc                        | 0.5 $\pm$ 0.0ab                        |
|               | COM           | Serradella  | 10.1 $\pm$ 0.6a                        | 1.0 $\pm$ 0.0a                         | 0.6 $\pm$ 0.0ab                        |
|               |               | Bare fallow | 10.0 $\pm$ 0.9a                        | 1.0 $\pm$ 0.0a                         | 0.6 $\pm$ 0.0ab                        |
|               | COM+TSP       | Serradella  | 10.1 $\pm$ 1.1a                        | 0.9 $\pm$ 0.0ab                        | 0.6 $\pm$ 0.0ab                        |
|               |               | Bare fallow | 10.0 $\pm$ 0.7a                        | 1.0 $\pm$ 0.0a                         | 0.6 $\pm$ 0.0ab                        |
|               | P0            | Serradella  | 8.8 $\pm$ 1.4abc                       | 0.8 $\pm$ 0.0b                         | 0.5 $\pm$ 0.0cd                        |
|               |               | Bare fallow | 8.2 $\pm$ 0.3bc                        | 0.7 $\pm$ 0.0b                         | 0.5 $\pm$ 0.0d                         |
| July 2019     | TSP           | Serradella  | 8.0 $\pm$ 0.3c                         | 0.7 $\pm$ 0.0b                         | 0.5 $\pm$ 0.0bcd                       |
|               |               | Bare fallow | 8.2 $\pm$ 0.6bc                        | 0.8 $\pm$ 0.0b                         | 0.5 $\pm$ 0.0bcd                       |
|               | COM           | Serradella  | 10.3 $\pm$ 0.8ab                       | 1.0 $\pm$ 0.0a                         | 0.5 $\pm$ 0.0abc                       |
|               |               | Bare fallow | 10.3 $\pm$ 1.1ab                       | 1.0 $\pm$ 0.1a                         | 0.5 $\pm$ 0.0ab                        |
|               | COM+TSP       | Serradella  | 11.0 $\pm$ 0.9a                        | 1.0 $\pm$ 0.0a                         | 0.6 $\pm$ 0.0a                         |
|               |               | Bare fallow | 9.8 $\pm$ 0.7abc                       | 0.9 $\pm$ 0.0ab                        | 0.5 $\pm$ 0.1abcd                      |
