# Supplementary material for: Impact of the Legume Catch Crop Serradella on Subsequent Growth and P Mobilization under Barley in Different Fertilization Treatments
Source: MDPI journal article supplement (doi:10.3390/agronomy11122437), 2021-11-29
Supplement: s1 [file s1]

**Table S1.** Plant nutrients of spring barley ( $C_{\text{tot}}$ : total carbon,  $N_{\text{tot}}$ : total nitrogen) affected by fertilization (P0 – no additional P, TSP - triple superphosphate; COM - compost; COM+TSP - compost + TSP) and treatment with/without Serradella in May and July 2019 on the test site Rostock. Mean values  $\pm$  standard deviation; post hoc test Tukey HSD  $p < 0.05$ ; abc = differences between fertilization and treatment within the sampling date.

| Sampling Date | Fertilization | Treatment   | $C_{\text{tot}}$ (g kg <sup>-1</sup> ) | $N_{\text{tot}}$ (g kg <sup>-1</sup> ) | $P_{\text{tot}}$ (g kg <sup>-1</sup> ) |
|---------------|---------------|-------------|----------------------------------------|----------------------------------------|----------------------------------------|
| May 2019      | P0            | Serradella  | 390.6 $\pm$ 3.5a                       | 51.8 $\pm$ 3.6a                        | 4.4 $\pm$ 0.6b                         |
|               |               | Bare fallow | 384.5 $\pm$ 5.5a                       | 52.9 $\pm$ 2.6a                        | 4.3 $\pm$ 0.4b                         |
|               | TSP           | Serradella  | 386.3 $\pm$ 4.2a                       | 53.1 $\pm$ 1.8a                        | 5.3 $\pm$ 0.7ab                        |
|               |               | Bare fallow | 387.4 $\pm$ 9.2a                       | 47.3 $\pm$ 8.2a                        | 4.9 $\pm$ 1.1ab                        |
|               | COM           | Serradella  | 382.6 $\pm$ 6.8a                       | 53.9 $\pm$ 0.8a                        | 5.5 $\pm$ 0.5ab                        |
|               |               | Bare fallow | 387.2 $\pm$ 2.5a                       | 52.0 $\pm$ 1.9a                        | 5.1 $\pm$ 0.6ab                        |
|               | COM+TSP       | Serradella  | 386.9 $\pm$ 4.1a                       | 54.8 $\pm$ 2.7a                        | 6.2 $\pm$ 0.7a                         |
|               |               | Bare fallow | 385.0 $\pm$ 2.1a                       | 54.3 $\pm$ 2.1a                        | 6.2 $\pm$ 0.3a                         |
| July 2019     | P0            | Serradella  | 405.0 $\pm$ 5.0ab                      | 18.2 $\pm$ 1.8b                        | 2.9 $\pm$ 0.6b                         |
|               |               | Bare fallow | 404.5 $\pm$ 8.3a                       | 16.1 $\pm$ 1.9b                        | 3.2 $\pm$ 0.5ab                        |
|               | TSP           | Serradella  | 405.6 $\pm$ 18.4a                      | 18.3 $\pm$ 3.3b                        | 2.4 $\pm$ 0.3c                         |
|               |               | Bare fallow | 386.6 $\pm$ 33.5ab                     | 24.4 $\pm$ 3.3a                        | 3.7 $\pm$ 0.7a                         |
|               | COM           | Serradella  | 404.6 $\pm$ 13.6a                      | 19.3 $\pm$ 2.6ab                       | 3.0 $\pm$ 0.3b                         |
|               |               | Bare fallow | 376.5 $\pm$ 9.0b                       | 17.8 $\pm$ 1.5b                        | 2.9 $\pm$ 0.1b                         |
|               | COM+TSP       | Serradella  | 403.4 $\pm$ 16.2a                      | 16.9 $\pm$ 1.9b                        | 2.8 $\pm$ 0.2b                         |
|               |               | Bare fallow | 405.5 $\pm$ 8.9a                       | 18.7 $\pm$ 3.8b                        | 3.1 $\pm$ 0.7b                         |
